# Supplementary material for: Aggregation-induced emission active thermally-activated delayed fluorescence materials possessing N-heterocycle and sulfonyl groups
Source: Royal Society of Chemistry journal article supplement (doi:10.1039/d1tc05196b), 2022-01-01
Supplement: d1tc05196b1.pdf [file d1tc05196b1.pdf]

## The Electronic Supplementary Information for

# Aggregation-induced Emission Active Thermally-activated Delayed Fluorescence Materials Possessing *N*-Heterocycle and Sulfonyl Groups

Yasunori Matsui,<sup>ab\*</sup> Yudai Yokoyama,<sup>a</sup> Takuya Ogaki,<sup>ab</sup> Kenta Ishiharaguchi,<sup>c</sup> Akitsugu Niwa,<sup>c</sup> Eisuke Ohta,<sup>ab</sup> Masaki Saigo,<sup>d</sup> Kiyoshi Miyata,<sup>d</sup> Ken Onda,<sup>d\*</sup> Hiroyoshi Naito,<sup>bc\*</sup> and Hiroshi Ikeda<sup>ab\*</sup>

<sup>a</sup> Department of Applied Chemistry, Graduate School of Engineering, Osaka Prefecture University, 1-1 Gakuen-cho, Naka-ku, Sakai, Osaka 599-8531, Japan

<sup>b</sup> The Research Institute for Molecular Electronic Devices (RIMED), Osaka Prefecture University, 1-1 Gakuen-cho, Naka-ku, Sakai, Osaka 599-8531, Japan

<sup>c</sup> Department of Physics and Electronics, Graduate School of Engineering, Osaka Prefecture University, 1-1 Gakuen-cho, Naka-ku, Sakai, Osaka 599-8531, Japan

<sup>d</sup> Department of Chemistry, Graduate School of Science, Kyushu University, 774 Motoooka, Nishi-ku, Fukuoka 819-0395, Japan

### Table of Contents

|                                                             |    |
|-------------------------------------------------------------|----|
| 1. General                                                  | S1 |
| 2. Preparation of Substrates                                | S1 |
| 3. Crystal Packing Structure of 2Cz2SB                      | S2 |
| 4. Determination of Excited State Energy Levels             | S2 |
| 5. Physical Properties of 2Cz2SB                            | S3 |
| 6. Numerical Simulations for Population of Excited Species  | S4 |
| 7. Fabrication of Inverted OLED and Device Characterization | S4 |
| 8. Full description of TR-IR Spectra                        | S4 |
| 9. Quantum Chemical Calculations                            | S6 |
| 10. NMR Spectra                                             | S7 |

## 1. General

Melting points (mp) were obtained with a Yanaco MP-500 or a Rigaku Thermo plus 2 EVO and are reported uncorrected. <sup>1</sup>H and <sup>13</sup>C NMR spectra were recorded at 400 and 100 MHz, respectively, on a Bruker AVANCE NEO 400 spectrometer. Chemical shifts ( $\delta$ ) are reported in ppm using the signal of tetramethylsilane (0.00 ppm) and CDCl<sub>3</sub> (77.00 ppm) as an internal standard for <sup>1</sup>H and <sup>13</sup>C NMR, respectively. IR spectra were recorded on a JASCO FT/IR 8300 spectrometer with transmission or attenuated total reflection (ATR) method. Low-resolution (LR) atmospheric solid analysis probe (ASAP) mass measurements were carried out with a Shimadzu LCMS-2020 and LabSolutions LCMS software. High-resolution (HR) electrospray ionization (ESI) mass measurements were carried out on a Bruker micrOTOF system after calibration using a sodium formate solution. Elemental analyses were carried out at the Research and Analytical Centre at Kanazawa University. UV-Vis absorption and photoluminescence (PL) spectra were recorded on JASCO V-570 and FP-8500 spectrophotometers, respectively. Absolute PL quantum yields were determined by utilizing the integrating sphere method with a HAMAMATSU C9920-02 absolute PL quantum yields measurement system. PL decay profiles for solutions were measured by using a HORIBA Jobin Yvon FluoroCube lifetime spectrofluorometer and analyzed using DAS6 PL decay analysis software. PL decay profiles for solid samples were measured by using a polychromator and a streak camera system (Hamamatsu C4780, time resolution: < 30 ps) synchronized with a regenerative Ti:sapphire amplifier (Spitfire Ace, ~120 fs, 1 kHz, 4 mJ/pulse, 800 nm). The output of the amplifier was led to the optical parametric amplifier (Spectra-Physics, TOPAS-prime), and the fourth harmonic wave (365 nm, < 21  $\mu$ J/cm<sup>2</sup>) of the signal pulse was used for excitation. All materials and solvents were used as purchased, unless otherwise noted.

## 2. Preparation of Substrates

Synthesis of 2Cz2SB and 2Mi2SB was carried out according to Scheme 1 in the main text. The detail of conversion of 1,2,4,5-tetrafluorobenzene using KSC<sub>6</sub>H<sub>4</sub>-*t*Bu to **2** is as follows. The final step reactions of **2** to give 2Cz2SB and 2Mi2SB were described in the experimental section of the main text.

**Potassium 4-(*tert*-butyl)benzenethiolate (KSC<sub>6</sub>H<sub>4</sub>-*t*Bu):** To a 200-mL round-bottom flask, 4-*tert*-butylbenzenethiol (5.0 g, 30 mmol), KOH (1.65 g, 25 mmol), and benzene (100 mL) were added and stirred for 5 h at 80 °C. After cooling to room temperature, precipitated solid was filtrated and washed by *n*-hexane (20 mL). Drying under reduced pressure gave

KSC<sub>6</sub>H<sub>4</sub>-*t*-Bu as a colourless powder (5.02 g, 24.6 mmol, y. 98%). mp > 300 °C; <sup>1</sup>H NMR (400 MHz, DMSO-*d*<sub>6</sub>) δ<sub>ppm</sub> 1.31 (s, 9H), 7.37 (AA'XX', *J* = 8.4 Hz, 2H), 7.45 (AA'XX', *J* = 8.4 Hz, 2H); ASAP-mass *m/z* 165 (C<sub>10</sub>H<sub>13</sub>S<sup>-</sup>).

**1,4-Difluoro-2,5-bis((4-*tert*-butyl)phenylthio)benzene (1):** To a three-necked round-bottom flask, KSC<sub>6</sub>H<sub>4</sub>-*t*-Bu (4.09 g, 20 mmol) and pyridine (40 mL) were added and stirred at 120 °C under Ar atmosphere. After 15 min, a pyridine solution of 1,2,4,5-tetrafluorobenzene (1.20 g, 8 mmol) was added dropwise and stirred at 120 °C for 16 h. After cooling to room temperature, the reaction mixture was poured into ice-water. Recrystallization of the precipitated solid from benzene gave **1** as colourless needles (2.54 g, 5.8 mmol, y. 72%). mp 167–169 °C; <sup>1</sup>H NMR (400 MHz, CDCl<sub>3</sub>) δ<sub>ppm</sub> 1.33 (s, 18H), 6.73 (t, *J* = 7.6 Hz, 2H), 7.35 (AA'BB', *J* = 8.7 Hz, 4H), 7.39 (AA'BB', *J* = 8.7 Hz, 4H); <sup>13</sup>C NMR (100 MHz, CDCl<sub>3</sub>) δ<sub>ppm</sub> 31.2 (6C), 34.7 (2C), 117.2 (dd, *J*<sup>CF</sup> = 18.9, 10.0 Hz, 2C), 124.5 (dd, *J*<sup>CF</sup> = 15.7, 12.6 Hz, 2C), 126.8 (4C), 127.9 (2C), 132.8 (4C), 152.0 (2C), 155.9 (dd, *J*<sup>CF</sup> = 243, 3.7 Hz, 2C); ASAP-mass *m/z* = 443 ((M+H)<sup>+</sup>, C<sub>26</sub>H<sub>28</sub>F<sub>2</sub>S<sub>2</sub>), Anal. Calcd. for C<sub>26</sub>H<sub>28</sub>F<sub>2</sub>S<sub>2</sub>: C, 71.65; H, 6.80. Found: C, 71.94; H, 6.85.

**1,4-Difluoro-2,5-bis((4-*tert*-butyl)phenylsulfonyl)benzene (2):** To a round-bottom flask, **1** (1.77 g, 4.0 mmol), 3-chloroperbenzoic acid (*m*CPBA, 5.55 g, 21 mmol), CH<sub>2</sub>Cl<sub>2</sub> (80 mL) were added and stirred for 21 h at room temperature. After addition of 20% aqueous NaOH (100 mL), the solution was extracted by CH<sub>2</sub>Cl<sub>2</sub> (100 mL × 2). The combined extracts were washed with saturated aqueous NaCl and concentrated under reduced pressure. Recrystallization of the obtained solid from CHCl<sub>3</sub>-*n*-hexane gave **2** as colourless powder. mp > 300 °C; <sup>1</sup>H NMR (300 MHz, CDCl<sub>3</sub>) δ<sub>ppm</sub> 1.33 (s, 18H), 7.57 (AA'BB', *J* = 8.4, 4H), 7.85 (t, *J* = 7.2 Hz, 2H), 7.91 (AA'BB', *J* = 8.4 Hz, 4H); <sup>13</sup>C NMR (100 MHz, CDCl<sub>3</sub>) δ<sub>ppm</sub> 31.0 (6C), 35.4 (2C), 118.8 (dd, *J*<sup>CF</sup> = 17.5, 10.1 Hz, 2C), 126.6 (4C), 128.5 (4C), 135.1–136.2 (m, 2C+2C), 154.4 (dd, *J*<sup>CF</sup> = 259, 5.1 Hz), 158.9 (2C); IR (ATR) ν<sub>cm<sup>-1</sup></sub> 1592, 1467, 1387, 1332, 1295, 1190, 1164, 1113, 1093, 902, 831, 797, 754, 674; Anal. Calcd. for C<sub>26</sub>H<sub>28</sub>F<sub>2</sub>O<sub>4</sub>S<sub>2</sub>: C, 61.64; H, 5.57. Found: C, 60.81; H, 5.50. HR-MS (ESI<sup>+</sup>) *m/z* = 507.1469 (Calcd. for C<sub>26</sub>H<sub>29</sub>F<sub>2</sub>S<sub>2</sub>O<sub>4</sub> (M+H)<sup>+</sup>, 507.1470).

### 3. Crystal Packing Structure of 2Cz2SB

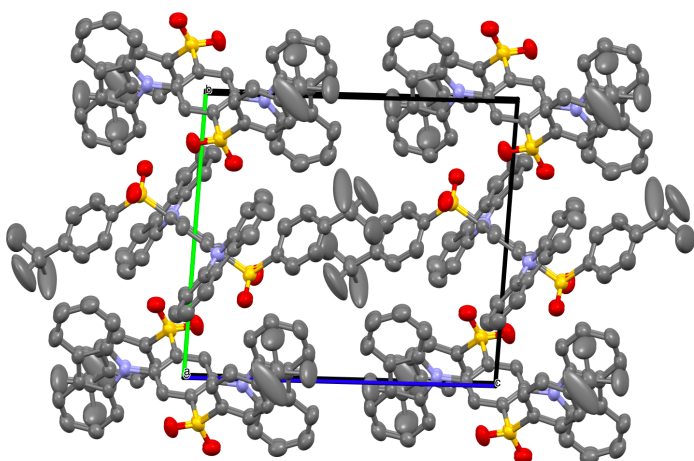

**Fig. S1.** Crystal packing diagram of 2Cz2SB. No remarkable attractive interactions are observed between the neighbouring molecules.

### 4. Determination of Excited State Energy Levels

Determination of excited state energy levels of 2Cz2SB and 2Mi2SB was carried out using steady-state PL and delayed (30 ms) PL spectra in 2-MTHF matrices at 77 K (Fig. S2). Analysis of these spectra shows that Δ*E*<sub>ST</sub> of 2Cz2SB and 2Mi2SB are 0.02 and 0.09 eV, respectively.

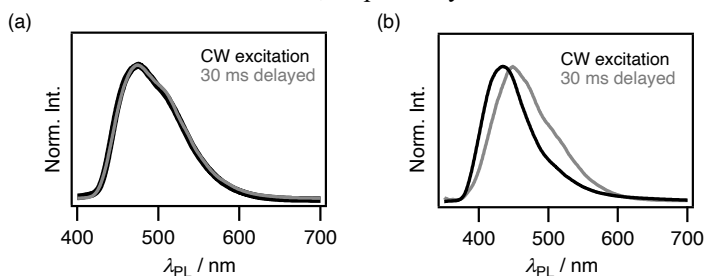

**Fig. S2.** Steady-state PL (black) and delayed PL (gray, 30 ms) spectra of (a) 2Cz2SB and (b) 2Mi2SB in 2-methyltetrahydrofuran matrix at 77 K.

## 5. Physical Properties of 2Cz2SB

**Table S1.** Photophysical Properties of 2Cz2SB in Benzene

| $\lambda_{FL} / \text{nm}$ | $\Phi_{PL,air}$ | $\Phi_{PL,Ar}$ | $\tau_{PL,air} / \text{ns}$ | $\tau_{PL,Ar} / \text{ns}$ | $k_{ISC} / 10^7 \text{ s}^{-1}$ | $k_{RISC} / 10^5 \text{ s}^{-1}$ |
|----------------------------|-----------------|----------------|-----------------------------|----------------------------|---------------------------------|----------------------------------|
| 524                        | 0.10            | 0.28           | 17.6 (89%)<br>395 (11%)     | 25.3 (37%)<br>8820 (63%)   | 3.4                             | 1.2                              |

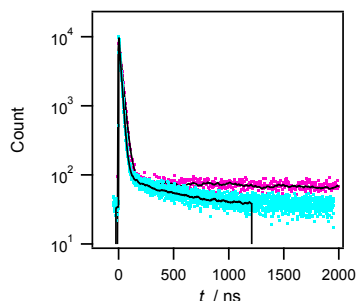

**Fig. S3.** FL decay profiles of 2Cz2SB in aerated (light blue) and Ar-saturated (purple) benzene.

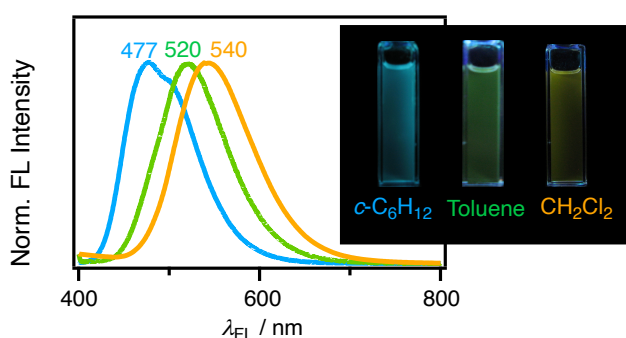

**Fig. S4.** Fluorescence spectra of 2Cz2SB in degassed *c*-C<sub>6</sub>H<sub>12</sub>, toluene, and CH<sub>2</sub>Cl<sub>2</sub>.

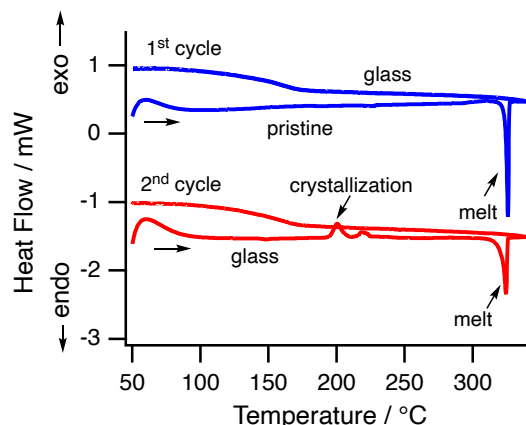

**Fig. S5.** DSC traces of crystals of 2Cz2SB (scan rate: 5 °C min<sup>-1</sup>). Exothermic peaks assigned to melting point (325 °C) was observed repeatedly. Also, any remarkable peaks were not observed in the region lower than the melting point at the first cycle, suggesting that 2Cz2SB have a high thermal stability.

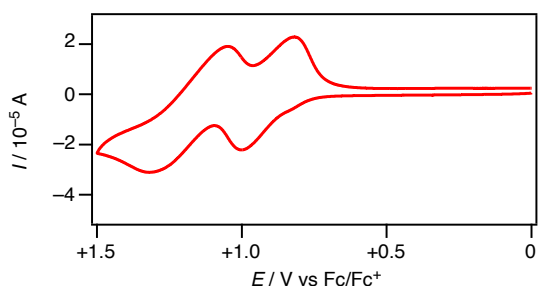

**Fig. S6.** Cyclic voltammogram of 2Cz2SB (1 mM) in CH<sub>2</sub>Cl<sub>2</sub> solution containing <sup>t</sup>Bu<sub>4</sub>N<sup>+</sup>BF<sub>4</sub><sup>-</sup> (0.1 M). Working and counter electrodes: Pt; Reference electrode: Ag/Ag<sup>+</sup>. Sweep rate: 0.1 V s<sup>-1</sup>. Pseudo-reversible oxidation waves are observed at anodic peak potentials at +1.00 and +1.31 V vs Fc/Fc<sup>+</sup>.

## 6. Numerical Simulations for Population of Excited Species

Populations of  $S_1$ - and  $T_1$ -excited species were simulated according to the kinetic model shown in Fig. S7. Populations of  $S_1$ - and  $T_1$ -excited species are described by eqns S1 and S2. As a result, time-dependent population of  $S_1$ - and  $T_1$ -excited species of 2Cz2SB are depicted in Fig. S8.

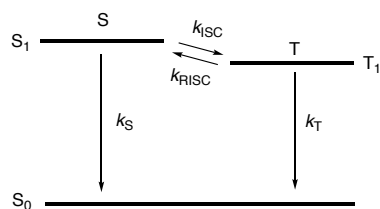

**Fig. S7.** Kinetic model for deactivation of  $S_1$ - and  $T_1$ -excited species.

$$\frac{d[S]}{dt} = -(k_S + k_{ISC})[S] + k_{RISC}[T] \quad (S1)$$

$$\frac{d[T]}{dt} = k_{ISC}[S] - (k_{RISC} + k_T)[T] \quad (S2)$$

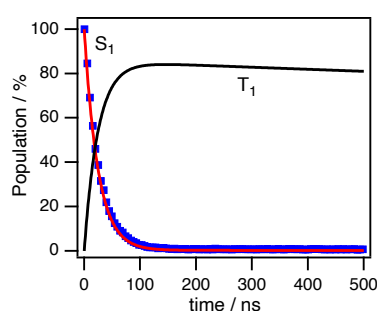

**Fig. S8.** Population of  $S_1$ - (red) and  $T_1$  (black)-excited species of 2Cz2SB in benzene using eqns S1 and S2 with parameters listed in Table S1. Blue dots are experimental FL decay profile.

## 7. Fabrication of Inverted OLED and Device Characterization

Inverted OLED of 2Cz2SB were fabricated by the following solution process. On the aluminium-doped zinc oxide electrode (cathode), ethanol solution of polyethyleneimine (PEI, 0.05 wt%) was spincoated (2000 rpm, 30 s) to form a PEI layer. After drying, emission layer (2Cz2SB/PMMA = 70/30, 1 wt% in  $\text{CH}_2\text{Cl}_2$ ) was spincoated (500 rpm, 5 s to 2000 rpm, 60 s). After drying,  $\text{MoO}_3$  and Al were vacuum-deposited as a hole-injection layer and anode, respectively.  $J$ - $L$ - $V$  characteristics and current efficiency are displayed in Figs. S9a and S9b, respectively.

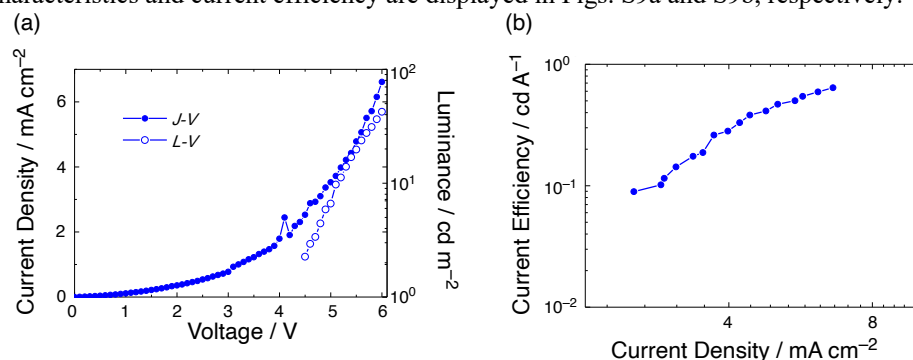

**Fig. S9.** (a)  $J$ - $L$ - $V$  characteristics of the fabricated OLED. The maximum luminance was  $42 \text{ cd m}^{-2}$  at 6 V. (b) Plots of current efficiency against current density. The maximum current efficiency was  $0.64 \text{ cd A}^{-1}$  at 6 V.

## 8. Full description of TR-IR Spectra

TR-IR measurements were performed using home-built setups with pump-probe scheme. A broadband mid-IR pulse for a probe light (pulse duration: 120 fs, bandwidth:  $150 \text{ cm}^{-1}$ , tunable range:  $1000\text{--}4000 \text{ cm}^{-1}$ ) was generated by difference-frequency generation between the signal and idler light from an optical parametric amplifier seeded by the output of a Ti:sapphire regenerative amplifier (pulse duration: 120 fs, wavelength: 800 nm, Spitfire Ace, Spectra-Physics). The pump pulse (pulse duration: 6 ns, wavelength: 355 nm) was obtained by third harmonic generation of the output of a nanosecond Nd:YAG laser (EKSPLA NL220). The time delay between the pump and probe pulses was controlled using a digital delay/pulse generator (Stanford Research Systems, DG645). The pump pulse fluence was approximately 2.6 and

26 mJ/cm<sup>2</sup> for KBr pellet and benzene solution, respectively. The sample solutions were continuously circulated through a home-built IR cell equipped with BaF<sub>2</sub> windows with an optical path length of 0.1 mm. A probe pulse passed through the IR cell was dispersed by a 19 cm polychromator, followed by detection using a 64-channel mercury cadmium telluride IR detector array. All measurements in 0.9 mM benzene solutions were performed after 1-h N<sub>2</sub>-prebubbling and while bubbling maintained. For the measurement of KBr pellets, the samples were prepared by mixing 2 mg of compounds and 100 mg of ground KBr and pressing it in a die, forming a pellet with diameter of 13.0 mm and thickness of 0.5 mm. The details were given in the previous reports.<sup>46,47,57</sup>

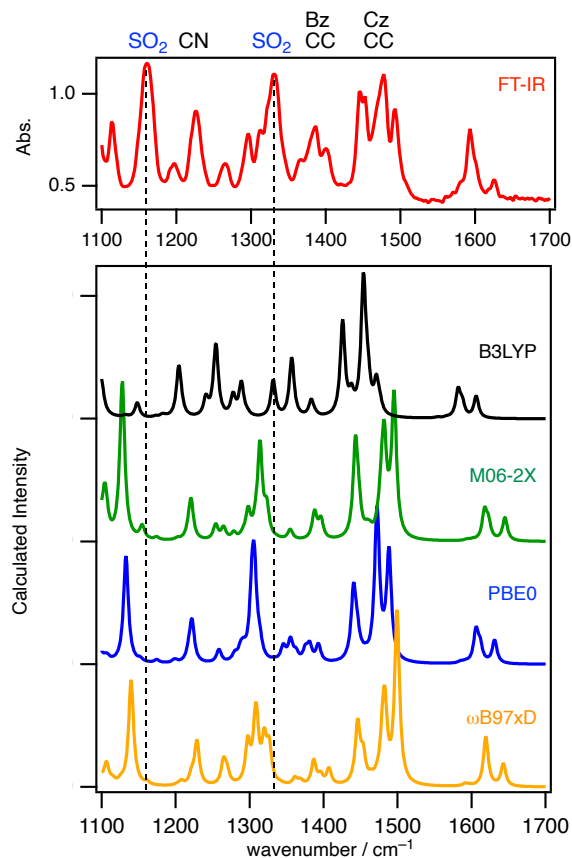

**Fig. S10.** Correspondence of FT-IR spectrum of 2Cz2SB in a KBr pellet with calculated IR spectra using B3LYP, M06-2X, PBE0, and  $\omega$ B97xD functionals with 6-31G(d,p) basis set. Scaling factors for all the calculated spectra are 0.96. The M06-2X and PBE0 functionals were suitable for 2Cz2SB.

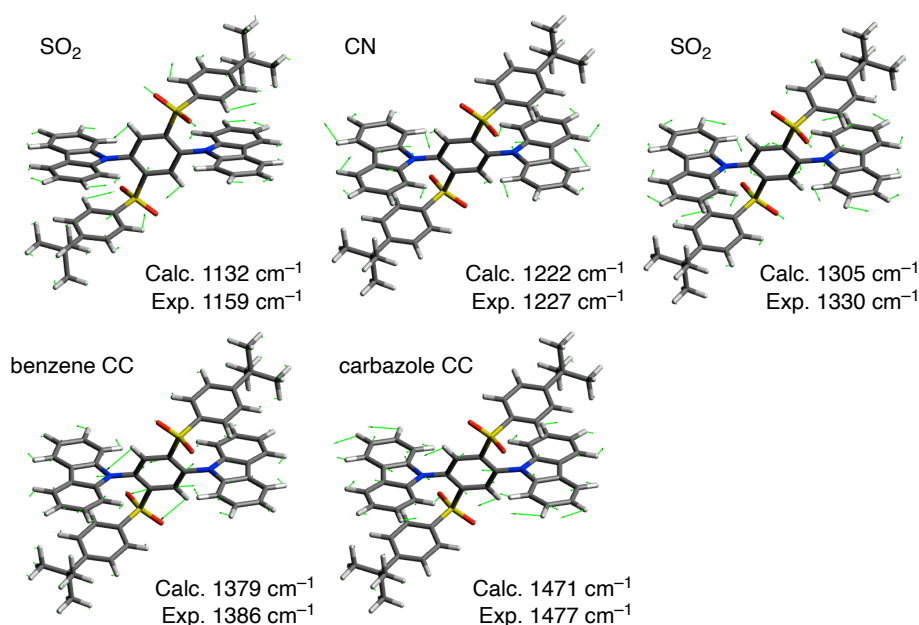

**Fig. S11.** Assignments for the IR spectrum of 2Cz2SB using the results of calculations at the PBE0/6-31G\* level of theory (Scaling factor: 0.96).

## 9. Quantum Chemical Calculations

The Cartesian coordinates of the optimized geometries are available online as .xyz file.

(a)

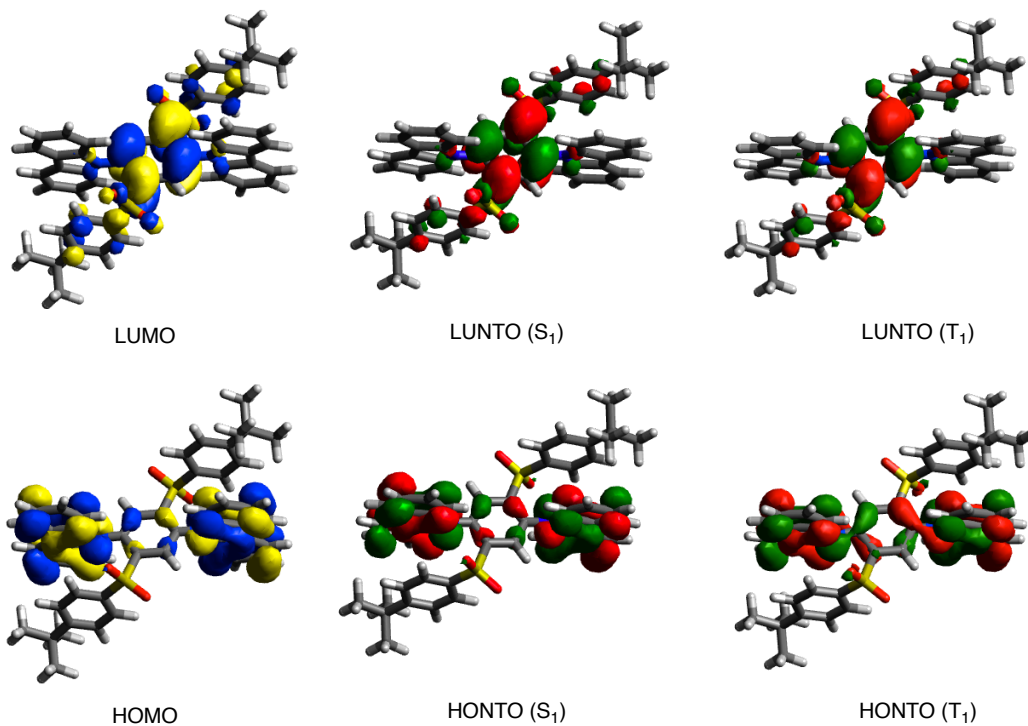

(b)

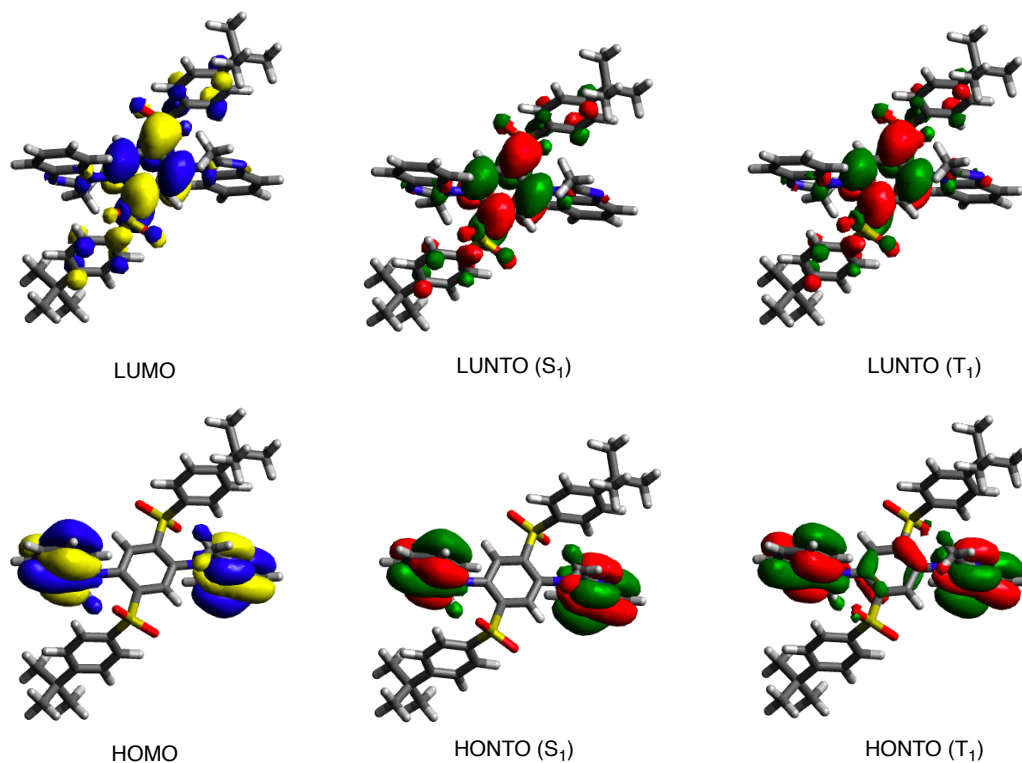

**Fig. S12.** Frontier molecular orbitals and natural transition orbitals ( $T_1$  and  $S_1$ ) of (a) 2Cz2SB and (b) 2Mi2SB (B3LYP/6-31G(d,p)).

## 10. NMR Spectra

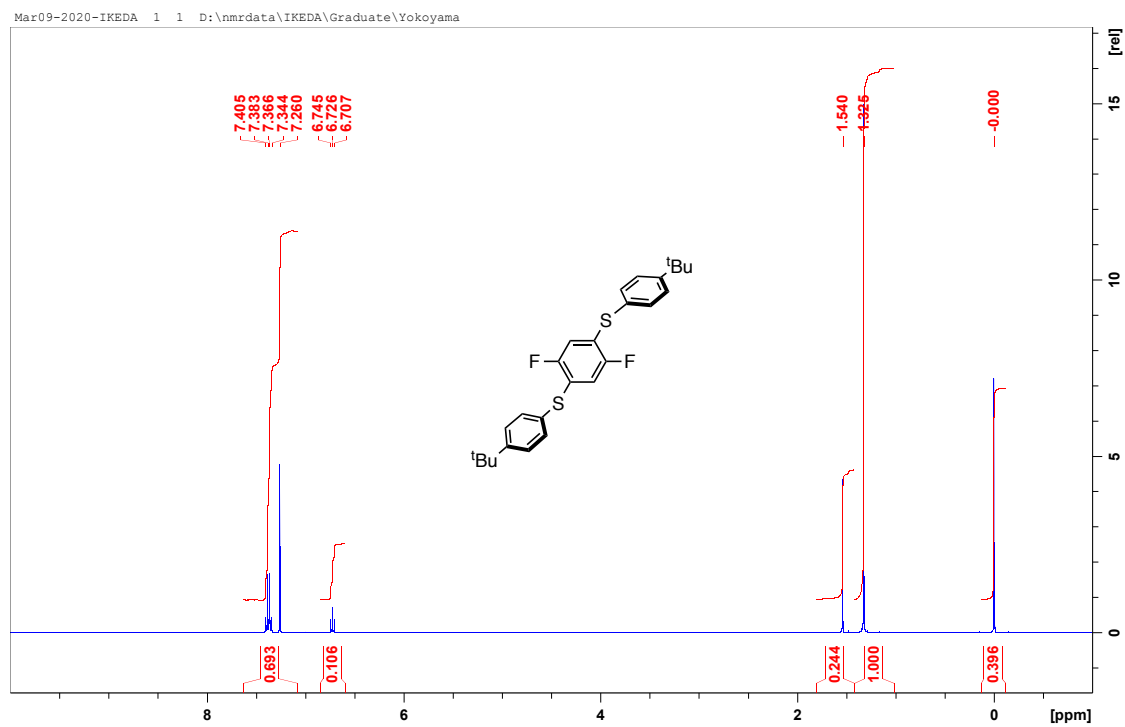

Fig. S13.  $^1\text{H}$  NMR spectrum of **1** (400 MHz,  $\text{CDCl}_3$ ).

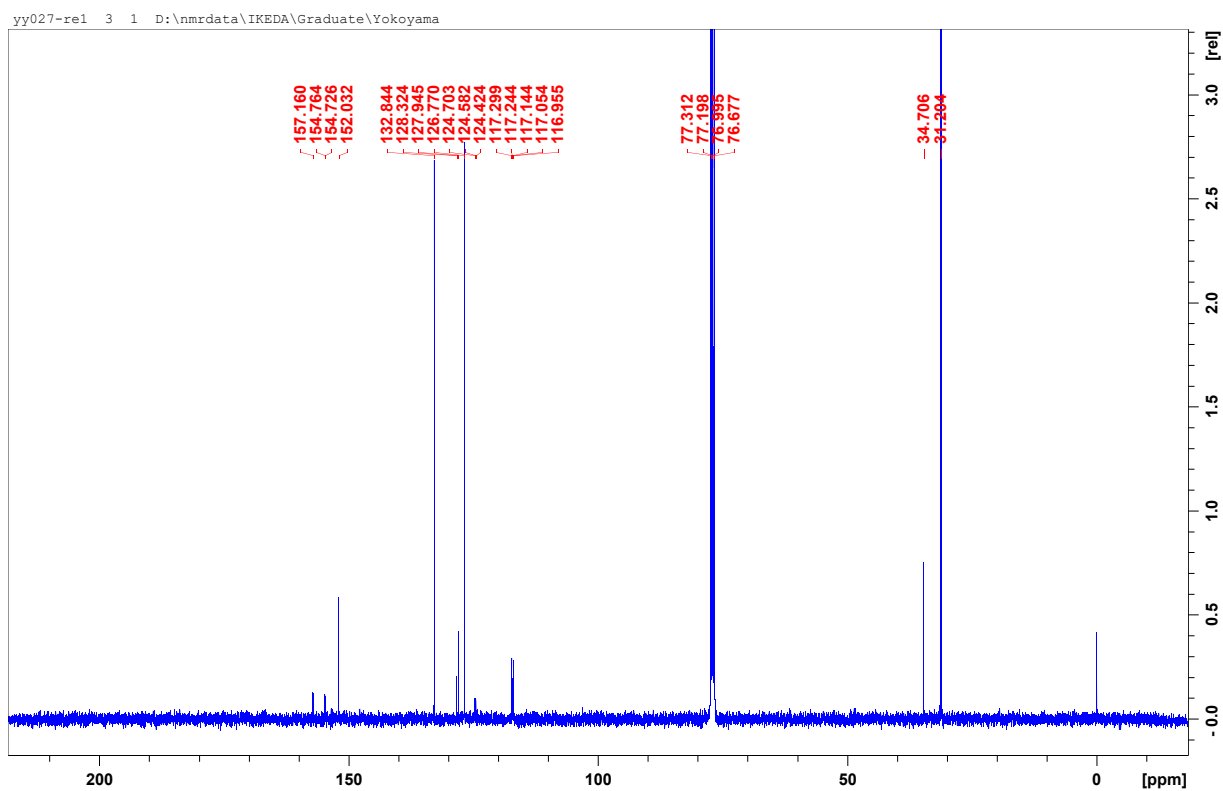

Fig. S14.  $^{13}\text{C}$  NMR spectrum of **1** (100 MHz,  $\text{CDCl}_3$ ).

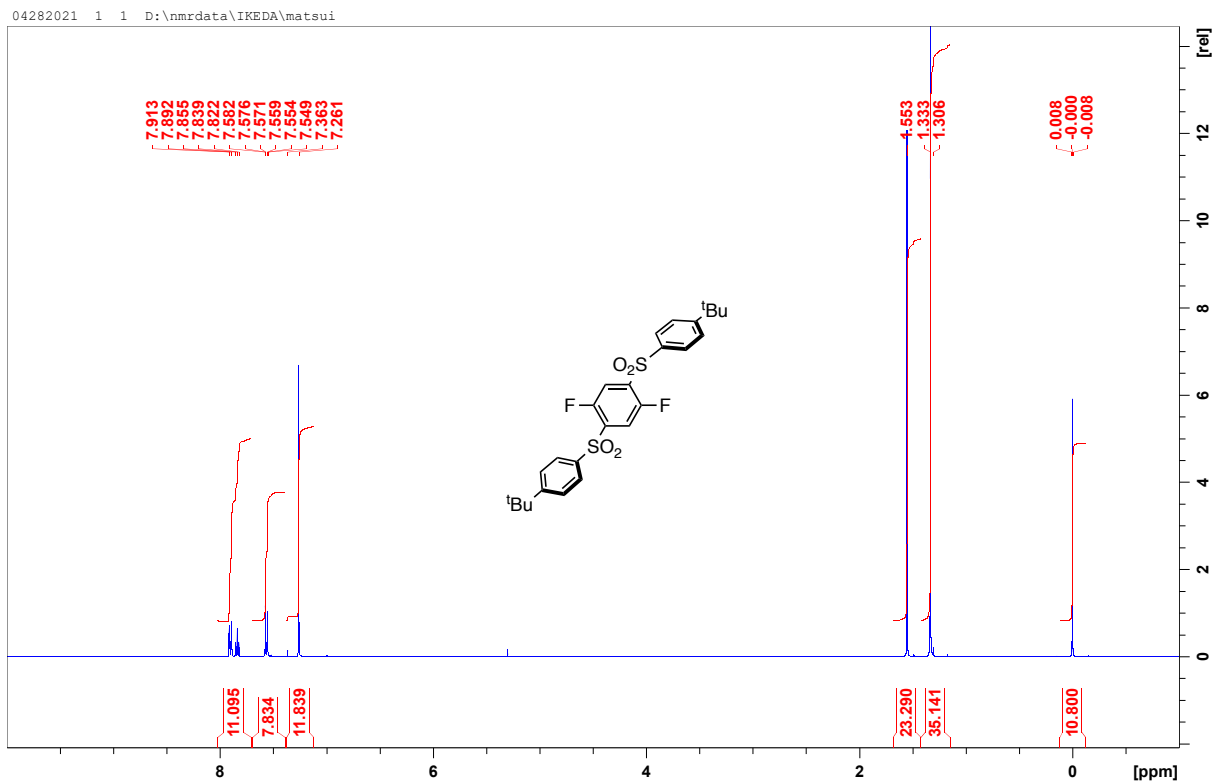

Fig. S15.  $^1\text{H}$  NMR spectrum of **2** (400 MHz,  $\text{CDCl}_3$ ).

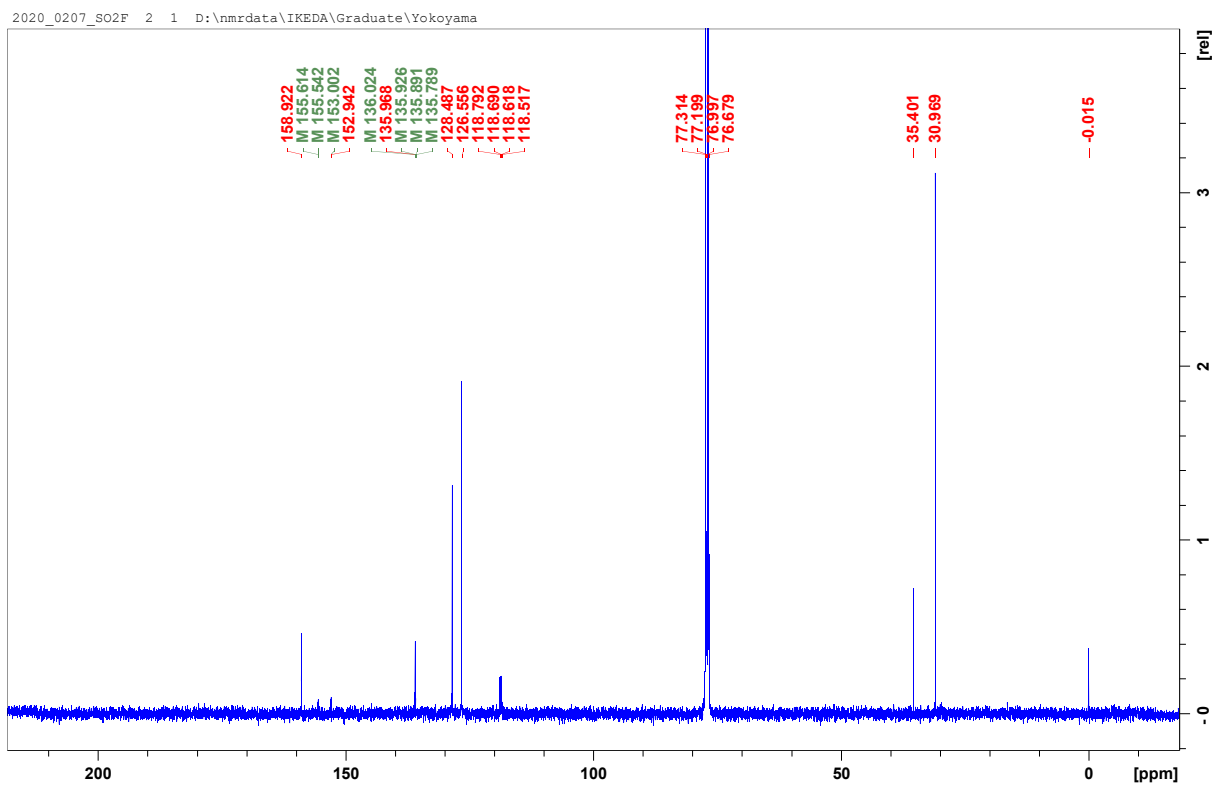

Fig. S16.  $^{13}\text{C}$  NMR spectrum of **2** (100 MHz,  $\text{CDCl}_3$ ).



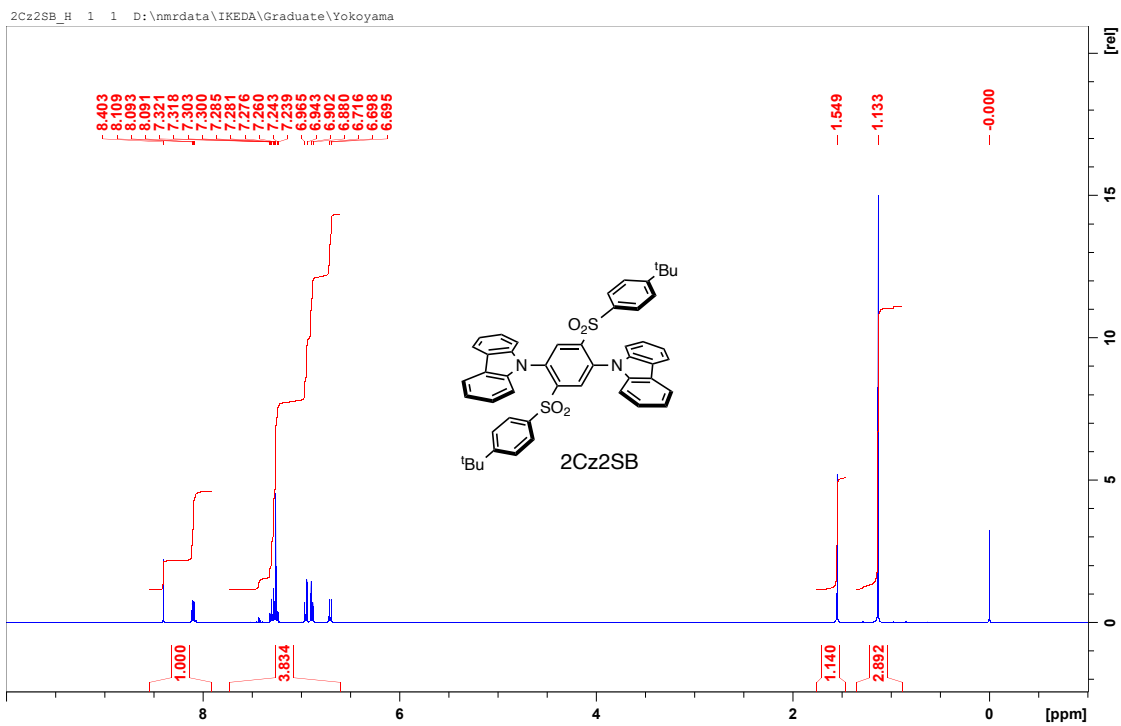

Fig. S17.  $^1\text{H}$  NMR spectrum of 2Cz2SB (400 MHz,  $\text{CDCl}_3$ ).

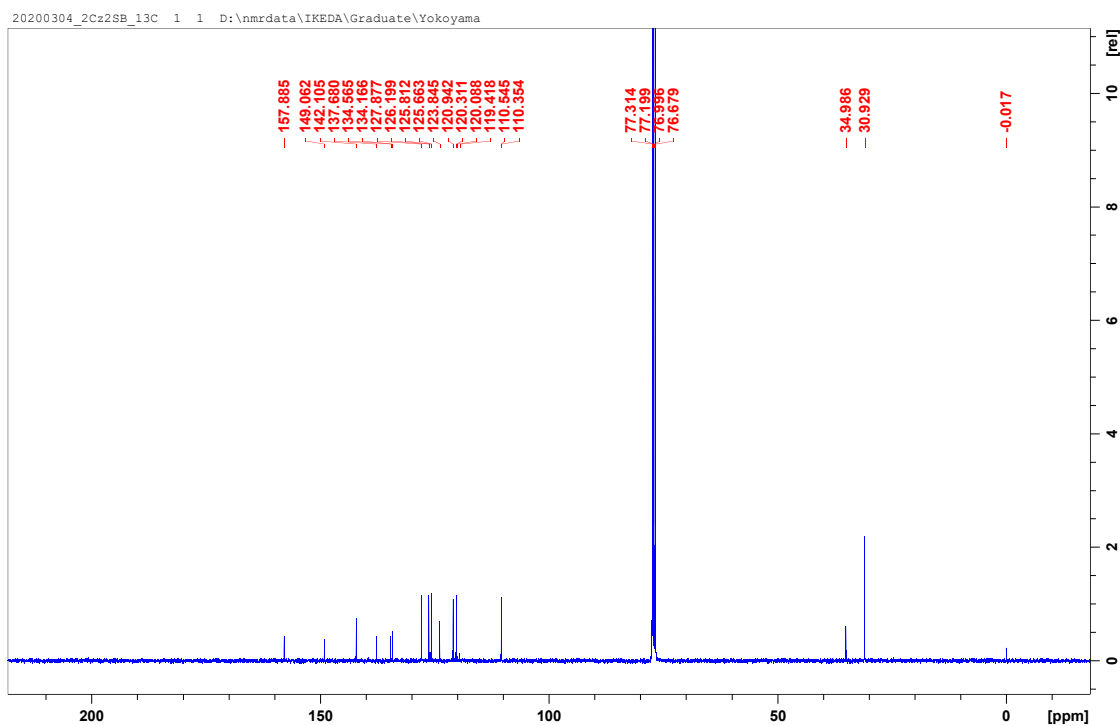

Fig. S18.  $^{13}\text{C}$  NMR spectrum of 2Cz2SB (100 MHz,  $\text{CDCl}_3$ ).

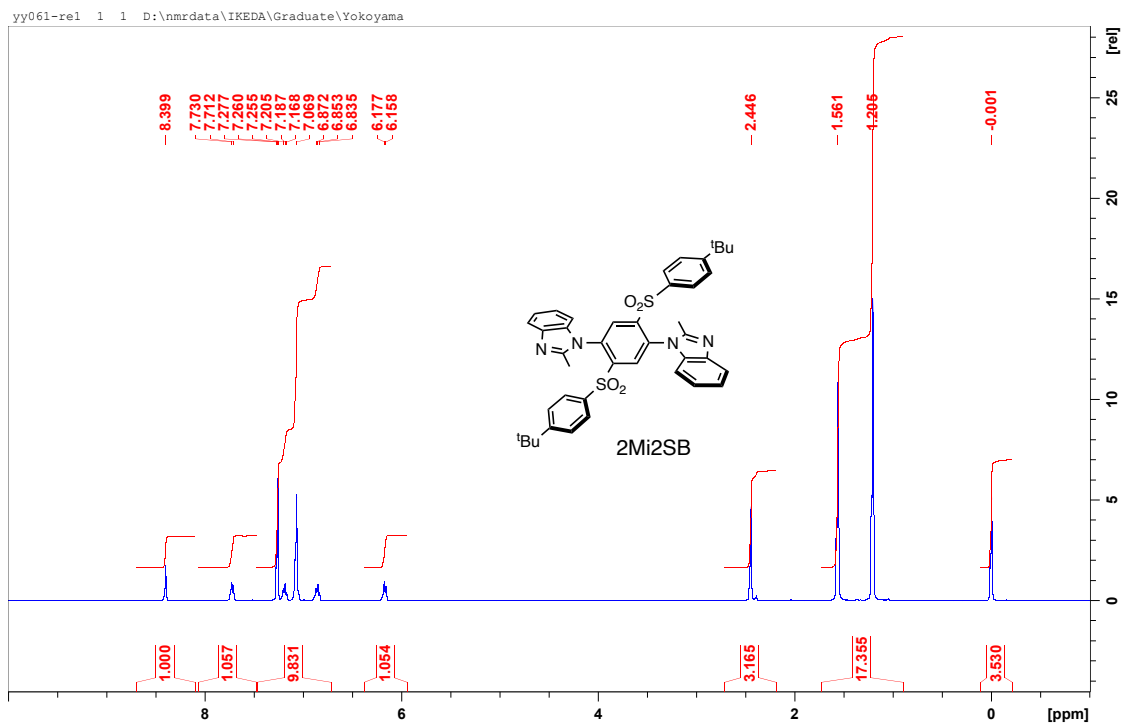

**Fig. S19.**  $^1\text{H}$  NMR spectrum of 2Mi2SB (400 MHz,  $\text{CDCl}_3$ ).

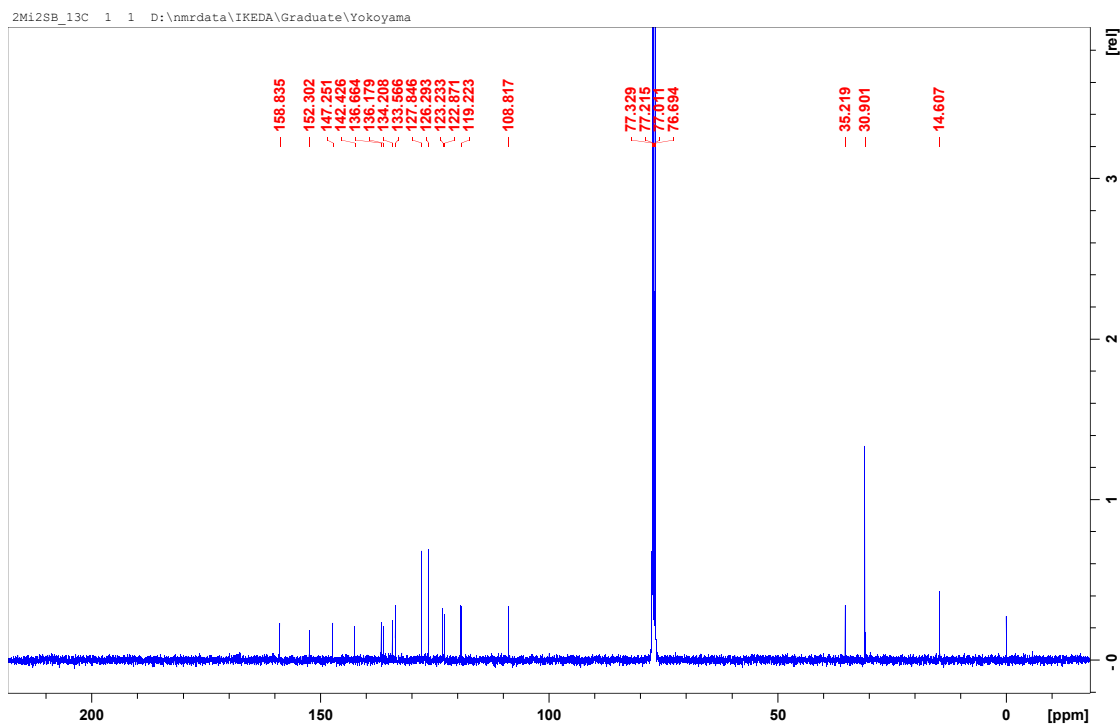

**Fig. S20.**  $^{13}\text{C}$  NMR spectrum of 2Mi2SB (100 MHz,  $\text{CDCl}_3$ ).

(EOF)
